# Supplementary material
Source: PubMed Central journal article supplement (PMC5395044)
Supplement: Supp_Table1.pdf [file Supp_Table1.pdf]

## Supplementary Data

SUPPLEMENTARY TABLE S1. TOP SINGLE NUCLEOTIDE POLYMORPHISMS ASSOCIATED WITH DRUG-INDUCED HEPATOTOXICITY IN THE GENOME-WIDE ASSOCIATION STUDY OF ANTIRETROVIRAL DRUG-ALONE AND ANTIRETROVIRAL AND ANTI-TUBERCULOSIS DRUGS CO-TREATMENT GROUPS

| Group      | SNP           | Chr (loci)     | Allele<br>I/2 (RA)   | I1vs                 | 22vs                 | Ivs2                 | $p_{min}$            | $p_{adj}$            | OR (95% CI)       | MAF          | Gene/loci    |
|------------|---------------|----------------|----------------------|----------------------|----------------------|----------------------|----------------------|----------------------|-------------------|--------------|--------------|
| ARV        | rs199650082   | 17 (62121526)  | T/C (T)              | $4.6 \times 10^{-2}$ | $2.6 \times 10^{-5}$ | $4.3 \times 10^{-6}$ | $4.3 \times 10^{-6}$ | $2.3 \times 10^{-6}$ | 21.4 (7.5 – 60.6) | 0.03         | ERNI         |
|            | rs32498       | 5 (55548797)   | A/G (A)              | $7.1 \times 10^{-6}$ | $2.1 \times 10^{-2}$ | $8.8 \times 10^{-6}$ | $7.1 \times 10^{-6}$ | $2.6 \times 10^{-5}$ | 11.5 (4.6 – 28.9) | 0.38         | ANKRD55      |
|            | rs7196606     | 16 (15941025)  | T/C (C)              | $5.6 \times 10^{-4}$ | $1.9 \times 10^{-3}$ | $2.9 \times 10^{-5}$ | $2.9 \times 10^{-5}$ | $2.8 \times 10^{-5}$ | 9.6 (3.3 – 27.8)  | 0.07         | MYH11        |
|            | rs7804397     | 7 (116857547)  | A/C (A)              | $1.8 \times 10^{-2}$ | $4.4 \times 10^{-5}$ | $7.3 \times 10^{-6}$ | $7.3 \times 10^{-6}$ | $3.0 \times 10^{-5}$ | 7.1 (3.1 – 16.2)  | 0.09         | ST7          |
|            | rs16947045    | 17 (61770954)  | T/C (T)              | $1.1 \times 10^{-2}$ | $3.1 \times 10^{-4}$ | $1.5 \times 10^{-5}$ | $1.5 \times 10^{-5}$ | $4.7 \times 10^{-5}$ | 7.4 (2.9 – 18.7)  | 0.05         | MAP3K3       |
|            | rs7206999     | 17 (61733668)  | A/G (A)              | $1.1 \times 10^{-2}$ | $3.1 \times 10^{-4}$ | $1.5 \times 10^{-5}$ | $1.5 \times 10^{-5}$ | $4.7 \times 10^{-5}$ | 7.4 (2.8 – 19.4)  | 0.05         | MAP3K3       |
|            | rs2305599     | 8 (121210250)  | A/G (A)              | $7.5 \times 10^{-4}$ | $9.0 \times 10^{-4}$ | $3.6 \times 10^{-5}$ | $3.6 \times 10^{-5}$ | $6.6 \times 10^{-5}$ | 6.1 (2.5 – 14.8)  | 0.19         | COL14A1      |
|            | rs152343      | 5 (55560577)   | T/C (T)              | $1.6 \times 10^{-6}$ | $4.0 \times 10^{-2}$ | $4.6 \times 10^{-6}$ | $1.6 \times 10^{-6}$ | $7.3 \times 10^{-5}$ | 10.5 (3.6 – 30.5) | 0.43         | PSMCIP4      |
|            | rs12632280    | 3 (87722254)   | T/C (C)              | $5.0 \times 10^{-2}$ | $1.7 \times 10^{-5}$ | $6.5 \times 10^{-5}$ | $1.7 \times 10^{-5}$ | $2.0 \times 10^{-4}$ | 4.9 (2.1 – 11.4)  | 0.26         | PSMCIP6      |
|            | rs7615453     | 3 (17490952)   | T/C (C)              | $2.4 \times 10^{-6}$ | $5.1 \times 10^{-2}$ | $6.4 \times 10^{-4}$ | $2.4 \times 10^{-4}$ | $3.6 \times 10^{-4}$ | 4.6 (1.9 – 10.8)  | 0.22         | NAALADL2     |
|            | rs7487755     | 12 (7631190)   | A/C (A)              | $9.0 \times 10^{-6}$ | $9.8 \times 10^{-2}$ | $2.5 \times 10^{-4}$ | $9.0 \times 10^{-6}$ | $5.0 \times 10^{-4}$ | 5.0 (2.0 – 10.0)  | 0.27         | CD163        |
|            | rs17064971    | 5 (165015242)  | A/G (G)              | $5.3 \times 10^{-1}$ | $3.9 \times 10^{-6}$ | $3.1 \times 10^{-4}$ | $3.9 \times 10^{-6}$ | $8.9 \times 10^{-4}$ | 5.9 (2.1 – 16.9)  | 0.48         | LOC574080    |
|            | rs971048      | 4 (13955163)   | A/G (A)              | $1.4 \times 10^{-5}$ | $5.8 \times 10^{-1}$ | $1.1 \times 10^{-3}$ | $1.4 \times 10^{-5}$ | $1.2 \times 10^{-3}$ | 3.3 (1.7 – 10.0)  | 0.37         | LOC391636    |
|            | rs937303      | 15 (33940768)  | T/C (C)              | $7.0 \times 10^{-1}$ | $8.5 \times 10^{-6}$ | $2.1 \times 10^{-4}$ | $8.5 \times 10^{-6}$ | $1.8 \times 10^{-3}$ | 11.6 (2.5 – 54.3) | 0.39         | RYR3         |
|            | rs4842407     | 12 (79201073)  | T/C (C)              | $1.1 \times 10^{-5}$ | $3.4 \times 10^{-5}$ | $2.3 \times 10^{-7}$ | $2.3 \times 10^{-7}$ | $7.2 \times 10^{-6}$ | 5.9 (2.7 – 12.8)  | 0.44         | LOC642550    |
|            | rs10862812    | 12 (84464616)  | T/C (T)              | $4.2 \times 10^{-4}$ | $1.6 \times 10^{-3}$ | $4.5 \times 10^{-5}$ | $4.5 \times 10^{-5}$ | $2.0 \times 10^{-5}$ | 4.7 (2.6 – 8.5)   | 0.27         | LOC100128335 |
|            | rs868567      | 10 (129266910) | T/G (G)              | $6.3 \times 10^{-4}$ | $2.3 \times 10^{-4}$ | $1.4 \times 10^{-5}$ | $1.4 \times 10^{-5}$ | $3.3 \times 10^{-5}$ | 4.8 (2.3 – 10.1)  | 0.29         | DOCK1        |
|            | rs16870561    | 6 (84230450)   | T/C (C)              | $4.5 \times 10^{-5}$ | $1.0 \times 10^0$    | $7.8 \times 10^{-5}$ | $4.5 \times 10^{-5}$ | $4.5 \times 10^{-5}$ | 10.6 (3.4 – 32.8) | 0.04         | PRSS35       |
|            | rs11012476    | 10 (21292923)  | A/G (A)              | $1.0 \times 10^{-0}$ | $5.7 \times 10^{-5}$ | $8.7 \times 10^{-5}$ | $5.7 \times 10^{-5}$ | $5.1 \times 10^{-5}$ | 13.7 (4.3 – 43.5) | 0.03         | NEBL         |
|            | rs2835071     | 21 (37032177)  | T/C (C)              | $1.2 \times 10^{-4}$ | $1.8 \times 10^{-3}$ | $1.7 \times 10^{-5}$ | $1.7 \times 10^{-5}$ | $5.4 \times 10^{-5}$ | 4.4 (2.2 – 9.1)   | 0.30         | EZH2P1       |
| rs251891   | 5 (115050362) | A/C (A)        | $2.0 \times 10^{-2}$ | $5.6 \times 10^{-4}$ | $1.2 \times 10^{-4}$ | $1.2 \times 10^{-4}$ | $6.0 \times 10^{-5}$ | 5.8 (2.7 – 12.2)     | 0.10              | TMED7-TICAM2 |              |
| rs10809892 | 9 (1315843)   | A/C (A)        | $2.4 \times 10^{-5}$ | $3.2 \times 10^{-2}$ | $8.0 \times 10^{-6}$ | $8.0 \times 10^{-6}$ | $1.4 \times 10^{-4}$ | 6.2 (2.7 – 14.0)     | 0.40              | RPS27AP14    |              |
| rs714046   | 8 (97631573)  | A/C (A)        | $1.6 \times 10^{-1}$ | $2.2 \times 10^{-5}$ | $9.2 \times 10^{-5}$ | $2.2 \times 10^{-5}$ | $1.4 \times 10^{-4}$ | 4.1 (2.0 – 8.3)      | 0.21              | SDC2         |              |
| rs7044362  | 9 (1316816)   | A/G (G)        | $8.5 \times 10^{-2}$ | $5.4 \times 10^{-6}$ | $5.1 \times 10^{-6}$ | $5.1 \times 10^{-6}$ | $1.9 \times 10^{-4}$ | 7.1 (2.5 – 19.9)     | 0.35              | RPS27AP14    |              |
| rs2270476  | 2 (211525764) | A/G (A)        | $5.5 \times 10^{-1}$ | $7.4 \times 10^{-6}$ | $5.3 \times 10^{-5}$ | $7.4 \times 10^{-6}$ | $2.0 \times 10^{-4}$ | 4.1 (1.9 – 8.3)      | 0.13              | CPS1         |              |
| rs2597553  | 4 (121786273) | A/G (A)        | $3.9 \times 10^{-5}$ | $3.7 \times 10^{-1}$ | $6.9 \times 10^{-5}$ | $3.9 \times 10^{-5}$ | $3.9 \times 10^{-4}$ | 5.0 (2.5 – 10.0)     | 0.29              | PRDM5        |              |
| rs7149043  | 14 (95116292) | A/G (A)        | $4.6 \times 10^{-1}$ | $1.3 \times 10^{-5}$ | $5.8 \times 10^{-4}$ | $1.3 \times 10^{-5}$ | $4.1 \times 10^{-4}$ | 3.3 (1.7 – 5.0)      | 0.29              | SERPINA13    |              |
| rs10809893 | 9 (1315952)   | T/C (T)        | $2.0 \times 10^{-5}$ | $2.9 \times 10^{-2}$ | $3.6 \times 10^{-6}$ | $3.6 \times 10^{-6}$ | $8.0 \times 10^{-4}$ | 10.0 (2.5 – 98.0)    | 0.30              | RPS27AP14    |              |

I1vs, dominant or recessive-inheritance model of Fisher's exact test depending on inheritance mode of allele 1; Ivs2, allelic model of Fisher's exact test; 22vs, dominant or recessive-inheritance model of Fisher's exact test depending on inheritance mode of allele 2; ARV, antiretroviral; ARV-ATD, antiretroviral and anti-tuberculosis drugs co-treatment; Chr (loci), chromosome, and chromosomal loci based on NCBI build 37; CI, confidence interval; DIH, drug-induced hepatotoxicity; ERNI, endoplasmic reticulum to nucleus signaling-1; MAF, minor allele frequency; OR, odds ratio;  $p_{adj}$ , logistic  $p$ -value after adjustment for covariates;  $p_{min}$ , minimum  $p$ -value among the genetic models of Fisher's exact test; RA, risk allele; SNP, single nucleotide polymorphism.
