# Supplementary material
Source: PubMed Central journal article supplement (PMC5395044)
Supplement: Supp_Table2.pdf [file Supp_Table2.pdf]

Supplementary Table S2. Top Single Nucleotide Polymorphisms Associated with Drug-Induced Hepatotoxicity in the Replication Study of Antiretroviral Drug-Alone and Antiretroviral and Anti-Tuberculosis Drugs Co-Treatment Groups

| Group      | SNP         | Chr (loci)    | Alleles (1/2) | I vs                   | 22vs                   | I vs2                  | p_min                  | p_adj                  | OR (95% CI)            | MAF            | Gene/loci |              |
|------------|-------------|---------------|---------------|------------------------|------------------------|------------------------|------------------------|------------------------|------------------------|----------------|-----------|--------------|
| ARV        | rs12632280  | 3 (87722254)  | T/C           | 2.0 × 10 <sup>-1</sup> | 1.0 × 10 <sup>0</sup>  | 3.0 × 10 <sup>-1</sup> | 2.0 × 10 <sup>-1</sup> | 7.7 × 10 <sup>-2</sup> | 20.0 (0.7–56.1)        | 0.26           | PSMCIP6   |              |
|            | rs199650082 | 17 (62121526) | T/C           | 1.0 × 10 <sup>0</sup>  | 2.6 × 10 <sup>-1</sup> | 2.6 × 10 <sup>-1</sup> | 2.6 × 10 <sup>-1</sup> | 2.3 × 10 <sup>-1</sup> | 6.8 (0.3–15.8)         | 0.02           | ERN1      |              |
|            | rs17064971  | 5 (165015242) | A/G           | 4.0 × 10 <sup>-1</sup> | 6.7 × 10 <sup>-1</sup> | 4.0 × 10 <sup>-1</sup> | 4.0 × 10 <sup>-1</sup> | 2.6 × 10 <sup>-1</sup> | 2.0 (0.6–6.7)          | 0.49           | LOC574080 |              |
|            | rs2305599   | 8 (121210250) | A/G           | 1.0 × 10 <sup>0</sup>  | 2.0 × 10 <sup>-1</sup> | 2.8 × 10 <sup>-1</sup> | 2.0 × 10 <sup>-1</sup> | 3.0 × 10 <sup>-1</sup> | 2.0 (0.5–7.0)          | 0.18           | COL14A1   |              |
|            | rs7615453   | 3 (174909952) | T/C           | 1.0 × 10 <sup>0</sup>  | 2.3 × 10 <sup>-2</sup> | 3.5 × 10 <sup>-1</sup> | 2.3 × 10 <sup>-2</sup> | 3.5 × 10 <sup>-1</sup> | 1.9 (0.5–7.3)          | 0.25           | NAALADL2  |              |
|            | rs152343    | 5 (55560577)  | T/C           | 1.0 × 10 <sup>0</sup>  | 4.1 × 10 <sup>-1</sup> | 5.8 × 10 <sup>-1</sup> | 4.1 × 10 <sup>-1</sup> | 4.7 × 10 <sup>-1</sup> | 1.5 (0.5–4.7)          | 0.43           | PSMCIP4   |              |
|            | rs32498     | 5 (55548797)  | A/G           | 5.8 × 10 <sup>-1</sup> | 7.0 × 10 <sup>-1</sup> | 1.0 × 10 <sup>0</sup>  | 5.8 × 10 <sup>-1</sup> | 9.8 × 10 <sup>-1</sup> | 1.1 (0.3–3.4)          | 0.38           | ANKRD55   |              |
|            | rs4968639   | 17 (61055390) | A/G           | 1.8 × 10 <sup>-1</sup> | 1.0 × 10 <sup>0</sup>  | 2.2 × 10 <sup>-1</sup> | 1.8 × 10 <sup>-1</sup> | 1.0 × 10 <sup>0</sup>  | NA                     | 0.14           | LOC729667 |              |
|            | rs7804397   | 7 (116857547) | A/C           | 1.0 × 10 <sup>0</sup>  | 5.9 × 10 <sup>-1</sup> | 6.1 × 10 <sup>-1</sup> | 5.9 × 10 <sup>-1</sup> | 1.0 × 10 <sup>0</sup>  | NA                     | 0.08           | ST7       |              |
|            | rs7196606   | 16 (15941025) | T/C           | 1.0 × 10 <sup>0</sup>  | NA                     | 0.08           | MYH11     |              |
|            | rs16947045  | 17 (61770954) | T/C           | 1.0 × 10 <sup>0</sup>  | NA                     | 0.05           | MAP3K3    |              |
|            | rs7206999   | 17 (61733668) | A/G           | 1.0 × 10 <sup>0</sup>  | NA                     | 0.05           | MAP3K3    |              |
|            | ARV-ATD     | rs251891      | 5 (115050362) | T/C                    | 2.0 × 10 <sup>-1</sup> | 1.6 × 10 <sup>-2</sup> | 8.9 × 10 <sup>-3</sup> | 8.9 × 10 <sup>-3</sup> | 1.3 × 10 <sup>-2</sup> | 4.5 (1.4–13.9) | 0.13      | TMED7-TICAM2 |
|            |             | rs11012476    | 10 (21292923) | A/G                    | 1.0 × 10 <sup>0</sup>  | 2.4 × 10 <sup>-2</sup> | 2.5 × 10 <sup>-2</sup> | 2.4 × 10 <sup>-2</sup> | 1.9 × 10 <sup>-2</sup> | 16.9 (1.6–178) | 0.02      | NEBL         |
|            |             | rs4842407     | 12 (79201073) | T/C                    | 4.9 × 10 <sup>-2</sup> | 8.4 × 10 <sup>-2</sup> | 1.6 × 10 <sup>-2</sup> | 1.6 × 10 <sup>-2</sup> | 2.2 × 10 <sup>-2</sup> | 4.2 (1.2–14.4) | 0.44      | LOC642550    |
|            |             | rs2835071     | 21 (37032177) | T/C                    | 1.4 × 10 <sup>-1</sup> | 3.6 × 10 <sup>-1</sup> | 1.3 × 10 <sup>-1</sup> | 1.3 × 10 <sup>-1</sup> | 4.0 × 10 <sup>-2</sup> | 4.0 (1.1–14.9) | 0.25      | EZH2PI       |
| rs2597553  |             | 4 (121786273) | A/G           | 2.8 × 10 <sup>-2</sup> | 5.9 × 10 <sup>-1</sup> | 2.4 × 10 <sup>-2</sup> | 2.4 × 10 <sup>-2</sup> | 5.2 × 10 <sup>-2</sup> | 8.7 (0.9–77.9)         | 0.32           | PRDM5     |              |
| rs10809893 |             | 9 (1315952)   | T/C           | 7.3 × 10 <sup>-1</sup> | 2.2 × 10 <sup>-1</sup> | 4.1 × 10 <sup>-1</sup> | 2.2 × 10 <sup>-1</sup> | 2.7 × 10 <sup>-1</sup> | 1.8 (0.6–5.2)          | 0.33           | RPS27API4 |              |
| rs10809892 |             | 9 (1315843)   | A/C           | 1.0 × 10 <sup>0</sup>  | 6.1 × 10 <sup>-1</sup> | 6.0 × 10 <sup>-1</sup> | 6.0 × 10 <sup>-1</sup> | 4.7 × 10 <sup>-1</sup> | 1.5 (0.5–4.4)          | 0.42           | RPS27API4 |              |
| rs2270476  |             | 2 (211525764) | A/G           | 1.0 × 10 <sup>0</sup>  | 8.0 × 10 <sup>-1</sup> | 1.2 (0.3–4.5)          | 0.20           | CPS1      |              |
| rs7044362  |             | 9 (1316816)   | A/G           | 2.9 × 10 <sup>-1</sup> | 4.8 × 10 <sup>-1</sup> | 1.0 × 10 <sup>0</sup>  | 2.9 × 10 <sup>-1</sup> | 9.8 × 10 <sup>-1</sup> | 1.1 (0.3–3.0)          | 0.38           | RPS27API4 |              |
| rs714046   |             | 8 (97631573)  | A/C           | 1.0 × 10 <sup>0</sup>  | 4.9 × 10 <sup>-2</sup> | 4.6 × 10 <sup>-2</sup> | 4.6 × 10 <sup>-2</sup> | 1.0 × 10 <sup>0</sup>  | NA                     | 0.02           | SDC2      |              |

NA, not applicable.
