# Supplementary material
Source: PubMed Central journal article supplement (PMC5395044)
Supplement: Supp_Table3.pdf [file Supp_Table3.pdf]

SUPPLEMENTARY TABLE S3. TOP SINGLE NUCLEOTIDE POLYMORPHISMS ASSOCIATED WITH DRUG-INDUCED HEPATOTOXICITY IN PHARMACOKINETIC GENES AND HUMAN LEUKOCYTE ANTIGEN REGION FOR ANTIRETROVIRAL DRUG-ALONE AND ANTIRETROVIRAL AND ANTI-TUBERCULOSIS DRUGS CO-TREATMENT GROUPS

| <i>Group</i> | <i>SNP</i> | <i>Chr (loci)</i> | <i>Alleles</i> | <i>p_min</i>         | <i>p_adj</i>         | <i>OR (95% CI)</i> | <i>MAF</i> | <i>Gene/loci</i> |
|--------------|------------|-------------------|----------------|----------------------|----------------------|--------------------|------------|------------------|
| ARV          | rs11642957 | 16 (16124008)     | T/C            | $9.5 \times 10^{-5}$ | $1.1 \times 10^{-4}$ | 4.9 (2.3–10.7)     | 0.18       | <i>ABCC1</i>     |
|              | rs9380345  | 6 (33080359)      | T/C            | $4.6 \times 10^{-3}$ | $1.0 \times 10^{-3}$ | 8.6 (2.4–31.2)     | 0.03       | <i>HLA-DPB2</i>  |
|              | rs2857204  | 6 (32744347)      | A/C            | $5.3 \times 10^{-3}$ | $8.8 \times 10^{-3}$ | 3.3 (1.1–10.0)     | 0.42       | <i>HLA-DQB2</i>  |
|              | rs13199787 | 6 (32705276)      | T/C            | $6.6 \times 10^{-3}$ | $2.3 \times 10^{-2}$ | 1.9 (0.6–6.4)      | 0.43       | <i>HLA-DQA2</i>  |
|              | rs2860975  | 10 (96766934)     | A/C            | $2.0 \times 10^{-3}$ | $2.5 \times 10^{-2}$ | 7.8 (1.7–35.7)     | 0.27       | <i>CYP2C9</i>    |
|              | rs1569343  | 4 (70341463)      | A/C            | $4.6 \times 10^{-3}$ | $2.6 \times 10^{-2}$ | 4.9 (1.6–15.2)     | 0.46       | <i>UGT2B4</i>    |
|              | rs12024396 | 1 (97880883)      | A/G            | $1.1 \times 10^{-3}$ | $2.8 \times 10^{-2}$ | 6.7 (2.0–21.8)     | 0.46       | <i>DPYD</i>      |
| ARV-ATD      | rs9276370  | 6 (32707295)      | A/C            | $2.8 \times 10^{-4}$ | $1.1 \times 10^{-3}$ | 5.1 (2.0–12.7)     | 0.36       | <i>HLA-DQA2</i>  |
|              | rs7773149  | 6 (32706042)      | A/G            | $3.5 \times 10^{-4}$ | $1.2 \times 10^{-3}$ | 3.8 (1.7–8.3)      | 0.36       | <i>HLA-DQA2</i>  |
|              | rs9341244  | 2 (38303095)      | A/G            | $3.8 \times 10^{-3}$ | $2.1 \times 10^{-3}$ | 8.8 (2.2–35.3)     | 0.02       | <i>CYP1B1</i>    |
|              | rs7592624  | 2 (234602906)     | A/G            | $3.3 \times 10^{-3}$ | $5.2 \times 10^{-3}$ | 4.5 (1.7–11.6)     | 0.38       | <i>UGT1A8</i>    |
|              | rs11203943 | 8 (18070927)      | T/C            | $3.9 \times 10^{-3}$ | $6.6 \times 10^{-3}$ | 4.7 (1.7–12.9)     | 0.06       | <i>NAT1</i>      |
|              | rs7670819  | 4 (70481880)      | T/C            | $2.9 \times 10^{-3}$ | $6.0 \times 10^{-2}$ | 16.8 (9.2–30.9)    | 0.45       | <i>UGT2A1</i>    |
